# Supplementary material for: Distribution of two-component signal transduction systems BlpRH and ComDE across streptococcal species
Source: Front Microbiol. 2022 Oct 24;13:960994. doi: 10.3389/fmicb.2022.960994 (PMC9638458; doi:10.3389/fmicb.2022.960994)
Supplement: Supplementary file 1 [file Table_1.XLSX]

## Sheet: Sheet1
A. BlpRH only
Strain name (NCBI accession number)	BlpR homologous	BlpH homologous	BlpC homologous	BlpRH location on genome (quarter)	% Similarity with BlpR_SPN	% Similarity with BlpH_SPN
Bovis group
S. equinus NCTC8140 (LR134282.1)	NCTC8140_01701	NCTC8140_01700	NCTC8140_01699	4th	63	52
S. equinus strain CNU G6 (CP046629.1)	GPA00_02065	GPA00_02060	GPA00_02055	4th	63	52
S. equinus strain FDAARGOS_251 (CP020438.2)	A6J79_01195	A6J79_01200	A6J79_01205	4th	63	56
S. equinus strain CNU 77-23 (CP046628.1)	GO596_03970	GO596_03975	BlpC*	4th	63	56
S. gallolyticus FDAARGOS 666 (CP050959.1)	FOB74_01145	FOB74_1140	FOB74_1135	4th	67	53
S. gallolyticus subsp. gallolyticus TX20005 (GL397173.1)	HMPREF9352_1964	HMPREF9352_1963	HMPREF9352_1962	4th	67	53
S. gallolyticus subsp. gallolyticus ATCC 43143 (AP012053.1)	SGGB_2000	SGGB_1999	SGGB_1998	4th	67	53
S. infantarius subsp infantarius CJ18 (CP003295.1)	Sinf_1717 (nonfunctional due to stop codon)	Sinf_1716 (nonfunctional due to stop codon)	Sinf_1715	4th
S. infantarius subsp infantarius ATCC BAA-102 (NZ_DS572691.1)	STRINF_RS04700	STRINF_RS04705	STRINF_RS04710	Shotgun sequence	64	64
S. macedonicus ACA DC 198 (HE613569.1)	SMA_1911	SMA_1910	SMA_1909	4th	67	54
S. macedonicus strain 679 (NZ_FLZS01000002.1)	SMA_RS09555	SMA_RS09550	SMA_RS11155	4th	67	54
Mutans group
S. caviae strain cavy grass 6 (MOWR01000001.1)	BMI76_01680	BMI76_01675	Not found	Shotgun sequence (393K)	70	46
S. criceti HS-6 (AEUV02000002.1)	STRCR_1338	STRCR_1339	Not found	2nd	55	49
S. diversiae DSM 19639 (NZ_AUIN01000012.1)	G573_RS0102205	G573_RS0102200	Not found	Shotgun sequence (240K)	70	42
S. downei F0415 (NZ_AEKN01000006.1)	HMPREF9176_RS03375	HMPREF9176_RS03380	BlpC**	Shotgun sequence (412K)	66	45
S. downei strain NCTC11391 or Streptococcus downei MFe28 (UHFA01000002.1)	NCTC11391_01284	NCTC11391_01285	BlpC**	2nd	66	45
S. mutans UA159 (AE014133.2)	SMU_1917	SMU_1916	SMU_1915	4th	69	57
S. mutans GS-5 (CP003686.1)	SMUGS5_08560	SMUGS5_08555	SMUGS5_08550	4th	69	58
S. mutans strain NG8 (CP013237.1)	APQ13_08920	APQ13_08925	APQ13_08930	4th	69	57
S. sobrinus strain NIDR 6715-7 (CP029560.1)	DLJ51_04555	DLJ51_04560	BlpC**	2nd	66	45
S. sobrinus NIDR 6715 15 (CP029559.1)	DLJ52_04555	DLJ52_04560	BlpC**	2nd	66	45
S. sobrinus strain SL1 (CP029490.1)	DK182_04610	DK182_04615	BlpC**	2nd	67	45
S. troglodytae TKU31 (AP014612.1)	SRT_02640	SRT_02650	SRT_02660	1st	70	57
Pyogenic group
S. agalactiae GBS ST 1 (CP013202.1)	AOY37_09640	AOY37_09635	AOY37_09630	4th	72	62
S. agalactiae strain S13 (CP018623.1)	BTH44_08700	BTH44_08695	BlpC*	4th	64	62
S. agalactiae isolate BM110 (LT714196.1)	BQ8897_BM110_01993	BQ8897_BM110_01992	BQ8897_BM110_01991	4th	72	62
S. dysgalactiae subsp equisimilis NCTC11554 (LR594047.1)	NCTC11554_00606	NCTC11554_00607	NCTC11554_00608	1st	71	55
S. dysgalactiae subsp equisimilis NCTC11556 (LR594048.1)	NCTC11556_00548	NCTC11556_00549	NCTC11556_00550	1st	71	55
S. dysgalactiae subsp. equisimilis GGS_124 (AP010935.1)	SDEG_0515	SDEG_0516	SDEG_0517	1st	71	55
S. dysgalactiae strain NCTC6403 (LR594046.1)	NCTC6403_00564	NCTC6403_00565	NCTC6403_00566	1st	71	55
S. equi subsp equi NCTC12091 (LR134273.1)	NCTC12091_01548	NCTC12091_01547	NCTC12091_01546	4th	73	63
S. equi subsp. Zooepidemicus strain OH-71905 (CP046040.1)	GJS32_08095	GJS32_08090	GJS32_08085	4th	73	64
S. equi subsp. equi 4047 (FM204883.1)	SEQ_1712	SEQ_1711	SEQ_1710a	4th	72	64
S. pyogenes emm197 (CP035455.1)	ETT44_07350	ETT44_07345	ETT44_07340	4th	71	55
S. pyogenes MGAS8232 (AE009949.1)	spyM18_0538	spyM18_0539	spyM18_0540	1st	71	55
S. pyogenes strain GUR (CP022354.1)	B2G65_07895	B2G65_07890	B2G65_07885	4th	71	55
S. uberis NCTC3858 (LS483397.1)	NCTC3858_00615	NCTC3858_00616	NCTC3858_00617	2nd	65	58
S. uberis 0140J (NC_012004.1)	SUB_RS02595	SUB_RS02600	SUB_RS09420	2nd	65	43 (1 to 132 aa missing)
Salivarius group
S. salivarius JF (CP014144.1)	AWB63_00865	AWB63_00870	Not found	1st, 3rd, and 4th	69	48
S. salivarius LAB813 (CP040804.1)	FHI56_09885	FHI56_09880	Not found	1st and 4th	70	53
S. salivarius ICDC2 (CP018187.1)	BSR19_02795	BSR19_02790	Not found	1st and 4th	70	54
S. salivarius strain HSISS4 (CP013216.1)	HSISS4_00378	HSISS4_00379	Not found	1st and 4th	70	54
s. salivarius strain NCTC8618 (LR134274.1)	NCTC8618_02646	NCTC8618_02647		1st and 4th	69	48
S. thermophilus CS9 (CP030927.1)	DR994_04265	DR994_04260	DR994_04255	2nd	81	69
S. thermophilus CNRZ1066 (CP000024.1)	str1686	str1687	str1688	4th	53	56
S. thermophilus strain B59671 (CP022547.1)	CG712_004440	CG712_004445	CG712_004450	2nd and 4th	53	56
S. vestibularis NCTC12167 (LR134275.1)	NCTC12167_00873	NCTC12167_00872	Not found	2nd	71	54
S. vestibularis OM08-1 (QSTK01000006.1)	DXC09_03465	DXC09_03470	Not found	Shotgun sequence (92K)	71	54
S. vestibularis ATCC 49124 (AEVI01000052.1)	HMPREF9425_1105	HMPREF9425_1106	Not found	Shotgun sequence (5.5K)	71	54
Suis group
S. suis AH681 (CP025043.1)	CWI26_01295	CWI26_01300	CWI26_01305	1st	82	56
S. suis D12 (CP002644.1)	SSUD12_1202	SSUD12_1201	SSUD12_1200	3rd	74	57
S. suis strain SRD478 (CP017088.1)	A7J08_06150	A7J08_06145	BlpC*	3rd	74	56
B. BlpRH and ComDE
Strain name (NCBI accession number)	BlpR homologous	BlpH homologous	BlpC homologous	ComC homologous	ComD homologous	ComE homologous	BlpRH location on genome (quarter)	ComDE location on genome (quarter)	% Similarity with BlpR_SPN	% Similarity with BlpH_SPN	% Similarity with ComE_SPN	% Similarity with ComD_SPN
Anginosus group
S. anginosus NCTC11064 (LR594037.1)	NCTC11064_00529	NCTC11064_00528	NCTC11064_00527	NCTC11064_01972	NCTC11064_01971	NCTC11064_01970	2nd	4th	73	61	85	64
S. anginosus subsp. whileyi MAS624 (AP013072.1)	ANG_1654	ANG_1655	ANG_1656	ANG_115	ANG_116	ANG_117	2nd	4th	73	61	85	64
S. anginosus FDAARGOS_1155 (NZ_CP068060.1)	I6J12_RS01700	I6J12_RS01695	I6J12_RS01690	I6J12_RS09750	I6J12_RS09745	I6J12_RS09740	2nd	4th	73	61	85	64
S. anginosus C238 (NC_022239.1)	SANR_RS02855	SANR_RS02850	SANR_RS02845	SANR_RS11380	SANR_RS10925	SANR_RS10920	2nd	4th	73	62	85	64
S. constellatus subsp pharyngis C818 (CP003840.1)	SCR2_0563	SCR2_0562	SCR2_0561	SCR2_1895	SCR2_1894	SCR2_1893	2nd	4th	73	62	86	62
S. constellatus subsp. pharyngis C232 (CP003800.1)	SCRE_0563	SCRE_0562	SCRE_0561	SCRE_1895	SCRE_1894	SCRE_1893	2nd	4th	73	62	86	62
S. constellatus subsp. constellatus SK53 (AICQ01000033.1, BASU01000010.1)	HMPREF1044_2855	HMPREF1044_2850	HMPREF1044_2845	ANG2_0989	ANG2_0990	ANG2_0989	Shotgun sequence (75K)	Shotgun sequence (70K)	73	62	86	50 (1 to 121 aa missing)
S. gordonii NCTC7868 (LR134291.1)	NCTC7868_00377	NCTC7868_00378	Not found	NCTC7868_02143	NCTC7868_02142	NCTC7868_02141	1st	4th	74	56	82	65
S. gordonii FDAARGOS_257 (CP020450.2)	A6J85_01905	A6J85_01900	Not found	A6J85_03835	A6J85_03840	A6J85_03845	1st	4th	74	56	82	61
S. gordonii FDAARGOS_371 (CP023511.1)	CO687_01230	CO687_01225	Not found	CO687_03070	CO687_03075	CO687_03080	1st	4th	74	56	82	61
S. intermedius C270 (CP003858.1)	SII_1172	SII_1173	SII_1174	SII_1869	SII_1868	SII_1867	3rd	4th	72	59	85	62
S. intermedius SK54	HMPREF1109_1142	HMPREF1109_1141	HMPREF1109_1140	HMPREF1109_1618	HMPREF1109_1619	HMPREF1109_1620	Shotgun sequence (218K)	Shotgun sequence	72	58	85	61
S. intermedius B196	SIR_1151	SIR_1152	SIR_1153	SIR_1901	SIR_1900	SIR_1898	3rd	4th	72	60	85	62
S. intermedius strain KCOM 1545 (CP012718.1)	RN88_05370	RN88_05365	RN88_05360	ComC*	RN88_09060	RN88_09055	3rd	4th	73	60	85	59
S. sanguinis CGMH010 (CP040798.1)	FFV08_04900	FFV08_04910	FFV08_04915	FFV08_12065	FFV08_12060	FFV08_12055	2nd	4th	67	49 (1 to 107 aa missing)
S. sanguinis CGMH058 (CP040798.1)	FDP16_04780	FDP16_04790	FDP16_04795	FDP16_12170	FDP16_12165	FDP16_12160	2nd	4th	67	49 (1 to 107 aa missing)
S. sanguinis FDAARGOS770 (CP054570.1)				FOC72_10335	FOC72_10340	FOC72_10345		4th
S. sanguinis NCTC10904 (NZ_LR134002.1)				ELZ47_RS11820	ELZ47_RS11815	ELZ47_RS11810		4th
S. sanguinis NCTC11085 (LS483346.1)				NCTC11085_02412	NCTC11085_02411	NCTC11085_02410		4th
S. sanguinis NCTC11086 (NZ_LS483364.1)				DQM55_RS11670	DQM55_RS11665	DQM55_RS11660		4th
S. sanguinis NCTC7863 (NZ_LS483385.1)				DQM63_RS11505	DQM63_RS11500	DQM63_RS11495		4th
S. sanguinis SK36 (CP000387.1)				SSA_2394	SSA_2379	SSA_2378		4th
								4th
Mitis group
S. mitis B6 (FN568063.1)	smi_0365	smi_0366	Not found	smi_2085	smi_2084	smi_2083	1st	4th	98	90	100	93
S. mitis strain S022-V3-A4 (CP047883.1)	M594_02005	M594_02010	Not found	M594_10045	M594_10040	M594_10035	1st	4th	98	89	100	95
S. mitis strain SVGS_061 (CP014326.1)	AXK38_05495	AXK38_05500	BlpC*	AXK38_10120	AXK38_10115	AXK38_10110	1st	4th	71	55	100	94
S. mitis Nm-65 (AP023349.1)	SMNM65_04620	SMNM65_04630	SMNM65_04640	SMNM65_20360	SMNM65_20350	SMNM65_20340	1st	4th	98	90	100	57 (1 to 190 aa missing)
S. pneumoniae TIGR4 (AE005672.3)	SP_0526	SP_0527	SP_0528	SP_2237	SP_2236	SP_2235	1st	4th
S. pneumoniae strain D39V (CP027540.1)	SPV_0468	SPV_0469	SPV_0470	SPV_2065	SPV_2064	SPV_2063	1st	4th	98	90	100	98
S. pneumoniae ATCC 49619 (AP018938.1)	SPAT_0497	SPAT_0498		SPAT_2124	SPAT_2123	SPAT_2122	1st	4th	98	92	100	98
S. pneumoniae 2245STDY6092581 (LR216042.1)	SAMEA3354333_00586	SAMEA3354333_00587	SAMEA3354333_00588	SAMEA3354333_00059	SAMEA3354333_00058	SAMEA3354333_00057	1st	4th	100	100	100	100
S. pneumoniae 574 (CP046360.1)	GL189_02475	GL189_02480	GL189_02485	GL189_10850	GL189_10845	GL189_10840	1st	4th	100	100	100	100
S. pneumoniae A66 (NZ_LN847353.1)	A66_RS02420	A66_RS02425	A66_RS02430	A66_RS00015	A66_RS00010	A66_RS00005	1st	4th	100	98	100	100
S. pneumoniae NCTC11902 (LS483417.1)	NCTC11902_00495	NCTC11902_00496	NCTC11902_00497	NCTC11902_02158	NCTC11902_02157	NCTC11902_02156	1st	4th	99	93	100	98
S. pneumoniae Taiwan19F (NC_012469.1)	SPT_RS02795	SPT_RS02800	SPT_RS02810	SPT_RS11165	SPT_RS11160	SPT_RS11155	1st	4th	99	96	100	98
S. pneumoniae TCH8431 (CP001993.1)	HMPREF0837_10820	HMPREF0837_10821	HMPREF0837_10823	HMPREF0837_10251	HMPREF0837_10250	HMPREF0837_10249	1st	4th	99	96	100	98
S. pneumoniae R6 (NC_003098.1)	SPR_RS02375	SPR_RS02380	SPR_RS02385	SPR_RS10410	SPR_RS10405	SPR_RS10400	1st	4th	98	90	100	98
S. pneumoniae NT 110 58 (CP007593.1)	SpnNT_00477	SpnNT_00478	SpnNT_00479	SpnNT_02313	SpnNT_02312	SpnNT_02311	1st	4th	78 (1 to 47 aa missing)	97	100	100
S. pneumoniae SPN XDR SMC1710 32 (CP025838.1)	C1H54_02585	C1H54_02590	C1H54_02595	C1H54_11200	C1H54_11195	C1H54_11190	1st	4th	84	99	100	98
S. pneumoniae SCAID PHRX1 2019 (CP052060.1)	HH205_02255 (frameshifted)	HH205_02260 (frameshifted)	HH205_02265 (frameshifted)	HH205_10345 (frameshifted)	HH205_10340	HH205_10335 (frameshifted)	1st	4th				100
S. pneumoniae 2245STDY5562278 (LR216010.1)	SAMEA2146691_00506	SAMEA2146691_00507	SAMEA2146691_00508	SAMEA2146691_00009	SAMEA2146691_00007, SAMEA2146691_00008	SAMEA2146691_00006	1st	4th	97	96	100
S. pneumoniae gamPNI0373 (NC_018630.1)	HMPREF1038_RS02740	HMPREF1038_RS02745	HMPREF1038_RS02750	HMPREF1038_RS11045	HMPREF1038_RS11040	Incomplete	1st	4th	97	95		98
S. pneumoniae strain CP2215 (NZ_CP028436.1)	DA395_RS02820	DA395_RS02825	DA395_RS02830	DA395_RS11420	DA395_RS11415	Absent	1st	4th	98	89		98
S. pneumoniae strain GPSC55 substr. ST3774 (NZ_LR536843.1)	E0F34_RS02720	E0F34_RS02725	E0F34_RS02730	E0F34_RS00015	E0F34_RS08265 (Incomplete)	E0F34_RS08260	1st	3rd (ComDE) and 4th (ComC)	99	96	94
S. oralis strain S.MIT/ORALIS-351 (CP019562.1)	BWR56_1569	BWR56_1568		BWR56_0006	BWR56_0007	BWR56_0008	1st	4th	98	92	99	85
S. oralis strain SOD (NZ_CP046523.1)	GOM48_RS07800	GOM48_RS07795	GOM48_RS07790	GOM48_RS09720	GOM48_RS09715	GOM48_RS09710	4th	4th	95	96	100	85
S. oralis strain FDAARGOS_1021 (CP066059.1)	I6H78_07140	I6H78_07145	I6H78_07150	I6H78_05390	I6H78_05395	I6H78_05400	1st	4th	96	90	99	85
S. oralis strain FDAARGOS_885 (CP065707.1)	I6G42_00125	I6G42_00120	I6G42_00115	I6G42_01945	I6G42_01940	I6G42_01935	4th	4th	99	94	100	83
S. oralis strain FDAARGOS_886 (CP065706.1)				I6G43_00815	I6G43_00810	I6G43_00805		4th			100	83
S. oralis strain FDAARGOS_367 (CP023507.1)				CO686_09125	CO686_09120	CO686_09115		4th			99	84
S. oralis strain FDAARGOS_1020 (CP066021.1)				I6H77_04200	I6H77_04205	I6H77_04210		4th			99	85
S. oralis strain FDAARGOS_1075 (CP066041.1)				I6I32_05445	I6I32_05450	I6I32_05455		4th			99	84
S. oralis strain 34 (CP079724.1)				KX728_09250	KX728_09245	KX728_09240		4th			99	83
S. oralis subsp. oralis strain ATCC 10557 (NZ_CP054135.1)				HRJ33_RS05520	HRJ33_RS05525	HRJ33_RS05530		4th			99	85
S. oralis ATCC 35037 strain NCTC 11427 (NZ_LR134336.1)				NCTC11427_01887	NCTC11427_01886	NCTC11427_01885		4th			99	85
S. oralis subsp. dentisani strain F0392 (NZ_CP034442.1)				EJF26_RS07220	EJF26_RS07215	EJF26_RS07210		4th			100	83
S. oralis strain SF100 (CP069427.1)				JQM34_0001402	JQM34_0001403	JQM34_0001404		4th			98	83
S. oralis subsp. oralis strain SN51445 (NZ_CP054134.1)				HRE59_RS01960	HRE59_RS01965	HRE59_RS01970		4th			99	84
S. oralis subsp. tigurinus (AP018338.1)				STO1_000050	STO1_000060	STO1_000070		4th			99	85
S. oralis strain Uo5 (FR720602.1)				SOR_1986	SOR_1985	SOR_1984		4th			98	83
S. parasanguinis FW213 (CP003122.1)	Spaf_0317	Spaf_0318	Not found	Not found	Spaf_2106	Spaf_2105	1st	4th	72	56	74	53
S. parasanguinis ATCC 15912 (CP002843.1)	HMPREF0833_11686	HMPREF0833_11687	Not found	Not found	HMPREF0833_11471	HMPREF0833_11470	1st	4th	72	55	74	53
S. parasanguinis SK236 (NZ_AFUC01000015.1)	HMPREF9962_RS08430	HMPREF9962_RS08425	Not found				Shotgun sequence (226K)		73	56
BlpC* - BlpC is found from nearby region of BlpRH
BlpC** - BlpC is present in nearby region of BlpRH
ComC* - ComC is found from nearby region of ComDE
